# Supplementary material
Source: PubMed Central journal article supplement (PMC10565645)
Supplement: NIHMS1933802-supplement-Supplementary_Material.pdf [file NIHMS1933802-supplement-Supplementary_Material.pdf]

**Supplemental Table 1****Adjusted<sup>1</sup> Sex-stratified Association between Urine BPA and ADHD by DSM-IV Criteria and/or Caregiver Report**

| Urine BPA concentration | aOR for ADHD (95% CI) by DSM-IV criteria and/or Caregiver report |                   |
|-------------------------|------------------------------------------------------------------|-------------------|
|                         | In Girls                                                         | In Boys           |
| < median                | 1.0 (Reference)                                                  | 1.0 (Reference)   |
| ≥ median                | 0.95 (0.11-7.86)                                                 | 10.48 (2.87-38.2) |

<sup>1</sup>Adjusted for child's age in years, income, race/ethnicity, urine creatinine, prenatal tobacco exposure, blood lead level (log<sub>10</sub>-transformed), urine organophosphate metabolite level (log<sub>10</sub>-transformed), insurance status.

Abbreviations: ADHD, Attention –Deficit/Hyperactivity Disorder; aOR, adjusted Odds Ratio; BPA, Bisphenol A; DSM-IV, Diagnostic and Statistical Manual of Mental Disorders, Fourth Edition.

**Supplemental Table 2****Adjusted<sup>1</sup> Sex-stratified Association between Urine BPA and Caregiver Report of ADHD**

| Urine BPA concentration | aOR for ADHD (95% CI) by Caregiver report alone |                    |
|-------------------------|-------------------------------------------------|--------------------|
|                         | In Girls                                        | In Boys            |
| < median                | 1.0 (Reference)                                 | 1.0 (Reference)    |
| ≥ median                | 0.55 (0.02-17.0)                                | 28.93 (6.17-135.6) |

<sup>1</sup>Adjusted for child's age in years, income, race/ethnicity, urine creatinine, prenatal tobacco exposure, blood lead level (log<sub>10</sub>-transformed), urine organophosphate metabolite level (log<sub>10</sub>-transformed), insurance status.

Abbreviations: ADHD, Attention –Deficit/Hyperactivity Disorder; aOR, adjusted Odds Ratio; BPA, Bisphenol A; DSM-IV, Diagnostic and Statistical Manual of Mental Disorders, Fourth Edition.
